# Supplementary material for: An inherited TBX3 alteration in a prenatal case of ulnar‐mammary syndrome: Clinical assessment and functional characterization in Drosophila melanogaster
Source: PubMed Central journal article supplement (PMC11649972; doi:10.1002/jcp.31440), 2024-09-25
Supplement: JCP-239-0-s002.pdf [file JCP-239-0-s002.pdf]

## TBX3 CDS and translation

1 ATGAGCCTCTCCATGAGAGATCCGGTCATTCTGGGACAAGCATG  
M S L S M R D P V I P G T S M

46 GCCTACCATCCGTTCTACCTACCGGGCGCCGGACTTCGCCATG  
A Y H P F L P H R A P D F A M

91 AGCGCGGTGCTGGGTCACCAGCCGCGTTCTTCCCCGCGCTGACG  
S A V L G H Q P P F F P A L T

136 CTGCCTCCCAACGGCGCGGGCGGCTCTCGCTGCCGGGCGCCCTG  
L P P N G A A A L S L P G A L

181 GCCAAGCCGATCATGGATCAATTGGTGGGGGCGCCGAGACCGGC  
A K P I M D Q L V G A A E T G

226 ATCCCGTTCTCCTCCCTGGGGCCCCAGGCGCATCTGAGGCCTTTG  
I P F S S L G P Q A H L R P L

271 AAGACCATGGAGCCCGAAGAAGAGGTGGAGGACGACCCCAAGGTG  
K T M E P E E E V E D D P K V

316 CACCTGGAGGCTAAAGAACTTTGGGATCAGTTTCACAAGCGGGGC  
H L E A K E L W D Q F H K R G

361 ACCGAGATGGTCATTACCAAGTCGGGAAGGCGAATGTTTCCTCCA

T E M V I T K S G R R M F E P  
S

**P134S**

406 TTTAAAGTGAGATGTTCTGGGCTGGATAAAAAAGCCAAATACATT

F K V R C S G L D K K A K Y I

451 TTATTGATGGACATTATAGCTGCTGATGACTGTCGTTATAAATTT

L L M D I I A A D D C R Y K F

496 CACAATTCTCGGTGGATGGTGGCTGGTAAGGCCGACCCCGAAATG

H N S R W M V A G K A D P E M

541 CCAAAGAGGATGTACATTCACCCGGACAGCCCCGCTACTGGGGAA

P K R M Y I H P D S P A T G E

586 CAGTGGATGTCCAAAGTCGTCACCTTCCACAAACTGAAACTCACC

Q W M S K V V T F H K L K L T

631 AACAAATTTTCAGACAAACATGGATTTACTATATTGAACTCCATG

N N I S D K H G F T I L N S M

676 CACAAATACCAGCCCCGGTTCACATTGTAAGAGCCAATGACATC

H K Y Q P R F H I V R A N D I

721 TTGAAACTCCCTTATAGTACATTTTCGGACATACTTGTTCCCCGAA

L K L P Y S T F R T Y L F P E

766 ACTGAATTCATCGCTGTGACTGCATAACCAGAATGATAAGATAACC

T E F I A V T A Y Q N D K I T

811 CAGTTAAAAATAGACAACA<sup>G</sup>CCCTTTTGCAAAGGTTTCCGGGAC

Q L K I D N <sup>N</sup> P F A K G F R D

**N277S**

<sup>S</sup>

856 ACTGGAATGGCCGAAGAGAAAAAAGAAAACAGCTCACCCCTGCAG

T G N G R R E K R K Q L T L Q

901 TCCATGAGGGTGTTTGGATGAAAGACACAAAAAGGAGAATGGGACC

S M R V F D E R H K K E N G T

946 TCTGATGAGTCCTCCAGTGAACAAGCAGCTTTCAACTGCTTCGCC

S D E S S S E Q A A F N C F A

991 CAGGCTTCTTCTCCAGCCGCCTCCACTGTAGGGACATCGAACCTC

Q A S S P A A S T V G T S N L

1036 AAAGATTTATGTCCCAGCGAGGGTGAGAGCGACGCCGAGGCCGAG

K D L C P S E G E S D A E A E

1081 AGCAAAGAGGAGCATGGCCCCGAGGCCTGCGACGCGGCCAAGATC

S K E E H G P E A C D A A K I

1126 TCCACCACCACGTCGGAGGAGCCCTGCCGTGACAAGGGCAGCCCC  
S T T T S E E P C R D K G S P

1171 GCGGTCAAGGCTCACCTTTTCGCTGCTGAGCGGCCCCGGGACAGC  
A V K A H L F A A E R P R D S

1216 GGGCGGCTGGACAAAGCGTCGCCCCGACTCACGCCATAGCCCCGCC  
G R L D K A S P D S R H S P A

1261 ACCATCTCGTCCAGCACTCGCGGCCTGGGCGCGGAGGAGCGCAGG  
T I S S S T R G L G A E E R R

1306 AGCCCGGTTTCGCGAGGGCACAGCGCCGGCCAAGGTGGAAGAGGCG  
S P V R E G T A P A K V E E A

1351 CGCGCGCTCCCGGGCAAGGAGGCCTTCGCGCCGCTCACGGTGCAG  
R A L P G K E A F A P L T V Q

1396 ACGGACGCGGCCCGCCGCGCACCTGGCCCAGGGCCCCCTGCCTGGC  
T D A A A A H L A Q G P L P G

1441 CTCGGCTTCGCCCCGGGCCTGGCGGGCCAACAGTTCTTCAACGGG  
L G F A P G L A G Q Q F F N G

1486 CACCCGCTCTTCCTGCACCCCAGCCAGTTTGCCATGGGGGGCGCC  
H P L F L H P S Q F A M G G A

1531 TTCTCCAGCATGGCGGCCGCTGGCATGGGTCCCCTCCTGGCCACG

F S S M A A A G M G P L L A T

1576 GTTTCTGGGGCCTCCACCGGTGTCTCGGGCCTGGATTCCACGGCC

V S G A S T G V S G L D S T A

T

M

**T539M**

1621 ATGGCCTCTGCCGCTGCGGCGCAGGGACTGTCCGGGGCGTCCGCG

M A S A A A A Q G L S G A S A

1666 GCCACCCTGCCCTTCCACCTCCAGCAGCACGTCCTGGCCTCTCAG

A T L P F H L Q Q H V L A S Q

1711 GGCTGGCCATGTCCCCTTTCGGAAGCCTGTTCCCTTACCCCTAC

G L A M S P F G S L F P Y P Y

1756 ACGTACATGGCCGCAGCGGCGGCCCTCCTCTGCGGCAGCCTCC

T Y M A A A A A A S S A A A S

1801 AGCTCGGTGCACCGCCACCCCTTCCTCAATCTGAACACCATGCGC

S S V H R H P F L N L N T M R

1846 CCGCGGCTGCGCTACAGCCCCTACTCCATCCCGGTGCCGGTCCC

P R L R Y S P Y S I P V P V P

1891 GACGGCAGCAGTCTGCTCACCACCGCCCTGCCCTCCATGGCGGCG

D G S S L L T T A L P S M A A  
 1936 GCCGCGGGGCCCTGGACGGCAAAGTCGCCGCCCTGGCCGCCAGC  
 A A G P L D G K V A A L A A S  
 1981 CCGGCCTCGGTGGCAGTGGACTCGGGCTCTGAACTCAACAGCCGC  
 P A S V A V D S G S E L N S R  
 2026 TCCTCCACGCTCTCCTCCAGCTCCATGTCCTTGTCGCCCAAACCTC  
 S S T L S S S S M S L S P K L  
 2071 TGCGCGGAGAA<sup>A</sup>AGAGGCGGCCACCAGCGAACTGCAGAGCATCCAG  
 C A E K E A A T S E L Q S I Q  
 R G G H Q R T A E H P **E695R**  
 2116 CGGTTGGTTAGCGGCTTGGAAGCCAAGCCGGACAGGTCCCGCAGC  
 R L V S G L E A K P D R S R S  
 A V G \*  
 2161 GCGTCCCCGTAG  
 A S P \*

**Supplementary Material 2.** Position of the four point variants (with the corresponding amino acid changes in the TBX protein), that have been introduced in the TBX CDS and cloned in the *pUAS-attB* vector (see also Materials and Methods).
