# Supplementary material for: An inherited TBX3 alteration in a prenatal case of ulnar‐mammary syndrome: Clinical assessment and functional characterization in Drosophila melanogaster
Source: J Cell Physiol. 2024 Sep 25;239(12):e31440. doi: 10.1002/jcp.31440 (PMC11649972; doi:10.1002/jcp.31440)
Supplement: Supplementary file 2 — Supporting information. [file JCP-239-0-s001.pdf]

**Supplementary Material 1 .** Data collected for the clinical and molecular revision of the literature
